# Supplementary material for: Intraoperative mechanical ventilation and incidence of pneumothorax in lymphangioleiomyomatosis
Source: Springer Nature journal article supplement (doi:10.1186/s13023-024-03117-w), 2024-03-23

## 中国医学科学院北京协和医院伦理审查委员会批件

|                                                                                                                                                                                                                                                                                                                                                                                                                                                                                                            |                                                                                     |                |                                                                                                 |
|------------------------------------------------------------------------------------------------------------------------------------------------------------------------------------------------------------------------------------------------------------------------------------------------------------------------------------------------------------------------------------------------------------------------------------------------------------------------------------------------------------|-------------------------------------------------------------------------------------|----------------|-------------------------------------------------------------------------------------------------|
| 项目编号                                                                                                                                                                                                                                                                                                                                                                                                                                                                                                       | K2197                                                                               | 受理号            | K22C0550                                                                                        |
| 医学研究题目                                                                                                                                                                                                                                                                                                                                                                                                                                                                                                     | 合并肺淋巴管平滑肌瘤病的手术患者术后气胸的危险因素研究                                                         |                |                                                                                                 |
| 题目简写                                                                                                                                                                                                                                                                                                                                                                                                                                                                                                       | 合并肺淋巴管平滑肌瘤病的手术患者术后气胸的危险因素研究                                                         |                |                                                                                                 |
| 研究经费来源                                                                                                                                                                                                                                                                                                                                                                                                                                                                                                     | 自选课题(自筹): 无(无)                                                                      |                |                                                                                                 |
| 项目科室                                                                                                                                                                                                                                                                                                                                                                                                                                                                                                       | 麻醉科                                                                                 | 项目负责人          | 裴丽坚                                                                                             |
| 研究类型                                                                                                                                                                                                                                                                                                                                                                                                                                                                                                       | 非干预性研究                                                                              | 牵头单位           | 中国医学科学院北京协和医院                                                                                   |
| 审查类别                                                                                                                                                                                                                                                                                                                                                                                                                                                                                                       | 初始审查                                                                                | 审查方式           | 快速审查                                                                                            |
| 会议日期                                                                                                                                                                                                                                                                                                                                                                                                                                                                                                       | NA                                                                                  | 会议地点           | NA                                                                                              |
| <b>伦理审查决定: 批准</b><br>批准日期: 2022-08-15<br>跟踪审查频率: <input type="checkbox"/> 3个月 <input type="checkbox"/> 6个月 <input checked="" type="checkbox"/> 1年 <input type="checkbox"/> 无 <input type="checkbox"/> 其他                                                                                                                                                                                                                                                                                                   |                                                                                     |                |                                                                                                 |
| <b>说明:</b><br>1. 请按照 GCP 原则和伦理委员会批准的文件开展研究, 保护受试者的健康与权益。<br>2. 凡涉及人类遗传资源管理或者国家规定必须经有关部门审批的项目, 均需在执行前向有关部门申报并获得批准。<br>3. 研究过程中, 对已批准的研究方案、知情同意书(如有)、招募材料(如有)等的任何修改以及研究者/研究项目负责人变更, 请提交修正案审查申请, 均须得到伦理委员会审查批准后方可实施。<br>4. 本中心发生的严重不良事件或严重影响受试者安全或权益的事件, 请于研究者获知后的 24 小时内向伦理委员会作书面报告, 伦理委员会有权对其评估做出新的决定。<br>5. 本中心发生偏离方案时, 请及时提交偏离方案报告。<br>6. 本批件有效期 1 年, 逾期未启动研究伦理批件失效。再次准备启动研究时, 需重新提交伦理审查。<br>7. 无论研究开始与否, 请按照伦理委员会规定的跟踪审查频率, 在截止日期前 1 个月提交跟踪审查报告。<br>8. 暂停或提前终止研究, 请及时提交暂停/终止研究报告。<br>9. 完成临床研究, 请提交结题报告。 |                                                                                     |                |                                                                                                 |
| 主任委员/副主任委员签字                                                                                                                                                                                                                                                                                                                                                                                                                                                                                               | 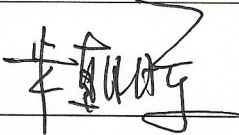 | 主任委员/副主任委员签字日期 | 2022-8-16  |

中国医学科学院北京协和医院伦理审查委员会

## 中国医学科学院北京协和医院伦理审查委员会批件

审查文件（注明版本号、版本日期）

- 1、研究者履历《项目负责人简历.pdf》(V1.0)
- 2、方案文档《研究方案.pdf》(V1.0)
- 3、病例报告表(样表)《研究对象基线资料收集.pdf》(V1.0)
- 4、知情同意书《豁免知情同意申请.pdf》(不适用)
- 5、科研人员利益冲突声明《科研人员利益冲突声明.pdf》
- 6、科研人员利益冲突声明《科研人员利益冲突声明.pdf》(不适用、2022-08-01)

声明:

1. 本伦理委员会的组成及工作程序符合《赫尔辛基宣言》、《人体生物医学研究国际道德指南》、《涉及人的生物医学研究伦理审查办法》、《药物临床试验质量管理规范》、《医疗器械临床试验质量管理规范》和《药物临床试验伦理审查工作指导原则》等国际伦理原则及我国相关规章和指导原则要求。
2. 所有参与审查的委员均在有效任职期间。
3. 所有参与审查的委员对所审阅的临床研究资料和相关的内容保密，且与本研究项目无利益冲突。
4. 本伦理委员会地址：北京东城区帅府园1号。联系人：李佳月/曹先锋。联系电话：010-69156874/69155709。

中国医学科学院北京协和医院伦理审查委员会

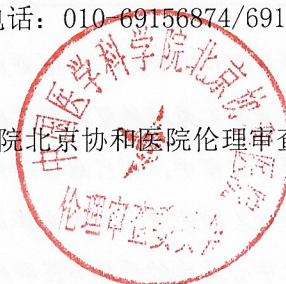

Supplement: 13023_2024_3117_MOESM1_ESM.pdf [file 13023_2024_3117_MOESM1_ESM.pdf]
